# Supplementary material for: Preclinical immunogenicity and safety of the cGMP-grade placental malaria vaccine PRIMVAC
Source: PubMed Central journal article supplement — eBioMedicine. 2019 Mar 15;42:145–56. doi: 10.1016/j.ebiom.2019.03.010 (PMC6491931; doi:10.1016/j.ebiom.2019.03.010), 2019-03-15
Supplement: mmc1.pdf [file mmc1.pdf]

## SUPPLEMENTARY TABLE 1

### Quality control data of the Master Cell Bank

|                          | RELEASE TESTS                             | SPECIFICATIONS                                                                  | RESULTS  |
|--------------------------|-------------------------------------------|---------------------------------------------------------------------------------|----------|
| <b>Stability</b>         | Numeration (before freezing)              | > $1 \times 10^8$ cfu/ml                                                        | Complies |
|                          | Viability (Numeration after freezing)     | > $1 \times 10^8$ cfu/ml                                                        | Complies |
|                          | Plasmid retention                         | > 80%                                                                           | Complies |
| <b>Purity</b>            | Bacterial and fungal contamination        | Aerobic contaminants:<br>< 1 contaminant / $10^7$ <i>E. coli</i>                | Complies |
|                          | Culture on Columbia CAP agar              | < 1 contaminant / $10^7$ <i>E. coli</i>                                         | Complies |
|                          | Bacteriophage detection                   | Abscence                                                                        | Complies |
| <b>Identity</b>          | Microscopic examination and GRAM staining | GRAM negative bacillus                                                          | Complies |
|                          | Biochemical characterisation              | Positive for <i>E. coli</i>                                                     | Complies |
|                          | Other biochemical parameter               | Resistant to kanamycin                                                          | Complies |
|                          | Protein expression                        | At least one specific band at 100 kDa after induction (Western Blot anti-DBL1x) | Complies |
|                          |                                           | At least one band at 100 kDa after induction (SDS-PAGE)                         | Complies |
| Genetic characterisation | Sequence conform                          | Complies                                                                        |          |

# SUPPLEMENTARY FIGURE 1

## Flow chart of the fermentation process

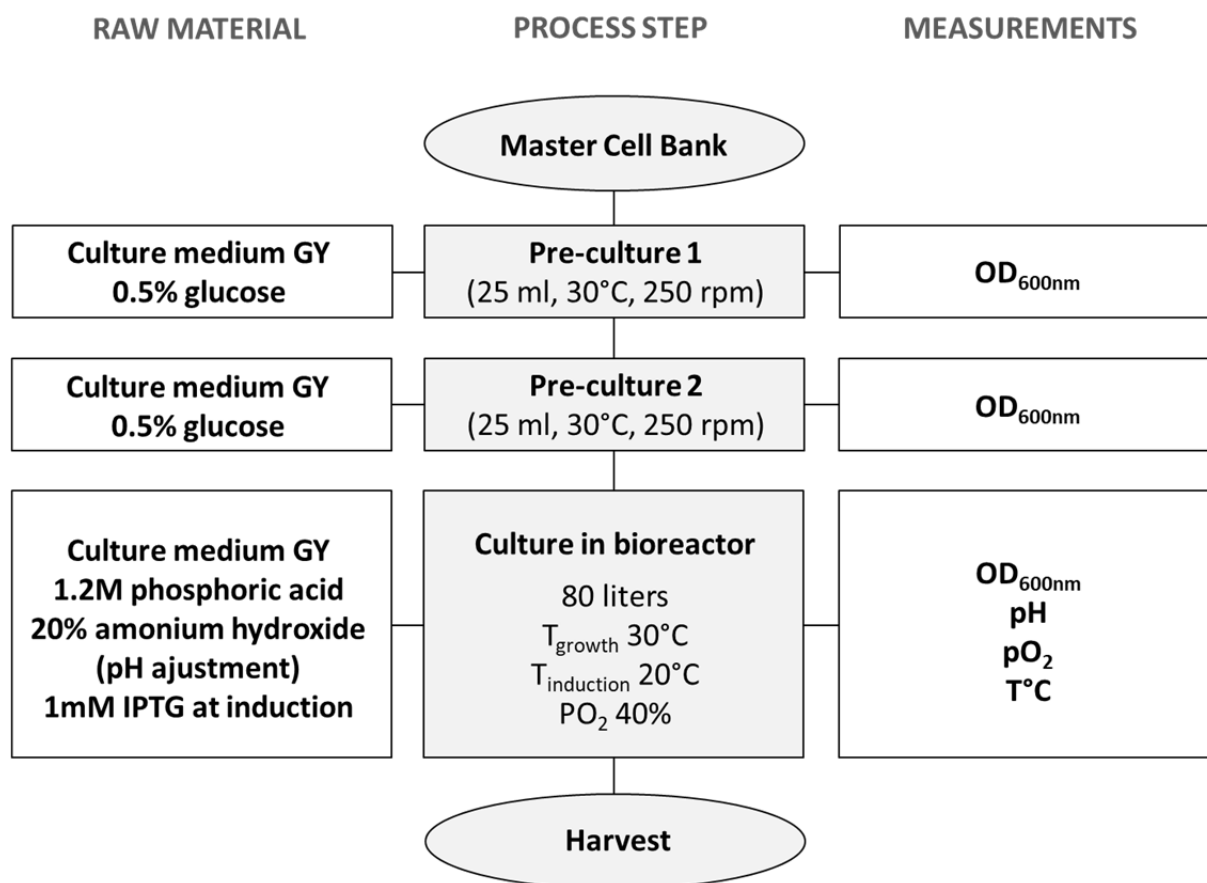

## SUPPLEMENTARY TABLE 2

### Mean body temperature 4 and 24 hours after the first and the last immunizations

| DAY | SEX | TIME |                   | TREATMENT            |                   |                    |                                     |                                |
|-----|-----|------|-------------------|----------------------|-------------------|--------------------|-------------------------------------|--------------------------------|
|     |     |      |                   | Group 1<br>0.9% NaCl | Group 2<br>GLA-SE | Group 3<br>PRIMVAC | Group 4<br>PRIMVAC<br>+ Alhydrogel® | Group 5<br>PRIMVAC<br>+ GLA-SE |
| 1   | M   | 0    | N                 | 16                   | 15                | 15                 | 17                                  | 15                             |
|     |     |      | mean              | 37.7                 | 37.7              | 38.0               | 37.5                                | 37.6                           |
|     |     | +4h  | mean <sup>2</sup> | 37.4                 | <b>38.4 **</b>    | 37.3               | 37.8                                | <b>38.4 **</b>                 |
|     |     | +24h | mean              | 37.8                 | 37.9              | 37.6               | 37.4                                | 37.9                           |
|     | F   | 0    | N                 | 15                   | 15                | 15                 | 15                                  | 15                             |
|     |     |      | mean              | 38.8                 | 38.9              | 38.5               | 38.3                                | 38.6                           |
|     |     | +4h  | mean <sup>1</sup> | 38.3                 | 39.0 **           | 38.2               | 38.0                                | 38.5                           |
|     |     | +24h | mean <sup>1</sup> | 38.7                 | 38.7              | 37.9 **            | 38.4 *                              | 38.3 *                         |
| 43  | M   | 0    | N                 | 15                   | 15                | 15                 | 15                                  | 15                             |
|     |     |      | mean <sup>1</sup> | 37.2                 | 36.8              | 37.5               | 37.5                                | 37.0                           |
|     |     | +4h  | mean              | 37.4                 | <b>37.8</b>       | 37.2               | 37.1                                | <b>37.8</b>                    |
|     |     | +24h | mean <sup>1</sup> | 37.7                 | 36.5 **           | 37.7               | 37.6                                | 37.1 **                        |
|     | F   | 0    | N                 | 15                   | 15                | 15                 | 15                                  | 15                             |
|     |     |      | mean <sup>1</sup> | 39.1                 | 38.5 **           | 38.9               | 38.7 *                              | 38.6 *                         |
|     |     | +4h  | mean <sup>1</sup> | 38.7                 | 38.6              | 38.1 *             | 38.4                                | 38.6                           |
|     |     | +24h | mean <sup>2</sup> | 38.8                 | 38.4 *            | 38.4               | 38.7                                | 38.3                           |

\*: (p<0.05), \*\*: (p<0.01) by <sup>1</sup> Dunnett test or <sup>2</sup> Dunn test with respect to Group 1; numbers in bold are statistically significant from pre-dose values (time 0) in the same group

## SUPPLEMENTARY TABLE 3

### Incidence of oedema, erythema and nodosities after injection

| LOCAL REACTION/<br>TIME          | SEX | TREATMENT               |                             |                           |                                     |                                |
|----------------------------------|-----|-------------------------|-----------------------------|---------------------------|-------------------------------------|--------------------------------|
|                                  |     | Group 1<br>0.9% NaCl    | Group 2<br>GLA-SE           | Group 3<br>PRIMVAC        | Group 4<br>PRIMVAC +<br>Alhydrogel® | Group 5<br>PRIMVAC +<br>GLA-SE |
| <b>Increase in size (oedema)</b> |     |                         |                             |                           |                                     |                                |
| <b>1st inj.<br/>(Day 1)</b>      | M   | -                       | 2/30 (1-8)                  | -                         | 5/34 (3.5-3)                        | 4/30 (1-4)                     |
|                                  | F   | -                       | 2/30 (1.5-5)                | -                         | -                                   | -                              |
| <b>2nd inj.<br/>(Day 15)</b>     | M   | -                       | -                           | -                         | 1/34 (1-6)                          | 3/30 (1-3.5)                   |
|                                  | F   | -                       | -                           | -                         | 6/30 (1-2)                          | 1/30 (1-1)                     |
| <b>3rd inj.<br/>(Day 29)</b>     | M   | -                       | -                           | -                         | 4/34 (1-3)                          | -                              |
|                                  | F   | -                       | -                           | -                         | 1/30 (1-1)                          | -                              |
| <b>4th inj.<br/>(Day 43)</b>     | M   | 1/32 <sup>a</sup> (0-2) | 7/30 <sup>a</sup> (0.5-2.5) | 1/30 (0-4)                | 10/34 <sup>a</sup> (0-3)            | 17/30 <sup>a</sup> (1.5-2)     |
|                                  | F   | 1/30 <sup>a</sup> (0-3) | 7/30 <sup>a</sup> (1.5-1.5) | 6/30 <sup>a</sup> (0.5-2) | 5/30 <sup>a</sup> (0-3)             | 22/30 <sup>a</sup> (1.5-2)     |
| <b>Erythema</b>                  |     |                         |                             |                           |                                     |                                |
| <b>1st inj.<br/>(Day 1)</b>      | M   | -                       | -                           | 1/30 (2-1)                | 2/34 (1-1.5)                        | -                              |
|                                  | F   | -                       | 1/30 (2-1)                  | -                         | 3/30 (1-2.5)                        | -                              |
| <b>2nd inj.<br/>(Day 15)</b>     | M   | -                       | 1/30 (0-3)                  | 1/30 (1-1)                | 1/34 (2-1)                          | 2/30 (0.5-2)                   |
|                                  | F   | -                       | 2/30 (0-2.5)                | -                         | -                                   | 1/30 (0-1)                     |
| <b>3rd inj.<br/>(Day 29)</b>     | M   | -                       | 3/30 (1-2.5)                | -                         | 1/34 (1-2)                          | 3/30 (1-2)                     |
|                                  | F   | -                       | -                           | -                         | -                                   | 1/30 (0-3)                     |
| <b>4th inj.<br/>(Day 43)</b>     | M   | -                       | -                           | -                         | -                                   | -                              |
|                                  | F   | -                       | -                           | -                         | -                                   | -                              |
| <b>Nodosities</b>                |     |                         |                             |                           |                                     |                                |
| <b>1st inj.<br/>(Day 1)</b>      | M   | -                       | -                           | -                         | -                                   | -                              |
|                                  | F   | -                       | -                           | -                         | 6/30 (11-18)                        | -                              |
| <b>2nd inj.<br/>(Day 15)</b>     | M   | -                       | -                           | -                         | -                                   | -                              |
|                                  | F   | -                       | -                           | -                         | -                                   | -                              |
| <b>3rd inj.<br/>(Day 29)</b>     | M   | -                       | -                           | -                         | -                                   | -                              |
|                                  | F   | -                       | -                           | -                         | 1/30 (0-3)                          | -                              |
| <b>4th inj.<br/>(Day 43)</b>     | M   | -                       | -                           | -                         | 1/34 (7-7)                          | -                              |
|                                  | F   | -                       | -                           | -                         | 2/30 (0-3)                          | -                              |

-: no findings

In brackets: mean latency – mean duration (in days)

Latency: Number of days between the injection day and the occurrence of the finding

Duration: Number of days for which the finding is present

<sup>a</sup> Finding still present in one or several animals at the time of sacrificed

## SUPPLEMENTARY TABLE 4

### Haematology parameters in male rats

| TIME/PARAMETER   | TREATMENT            |                   |                    |                                     |                                |
|------------------|----------------------|-------------------|--------------------|-------------------------------------|--------------------------------|
|                  | Group 1<br>0.9% NaCl | Group 2<br>GLA-SE | Group 3<br>PRIMVAC | Group 4<br>PRIMVAC +<br>Alhydrogel® | Group 5<br>PRIMVAC +<br>GLA-SE |
| <b>Day 3</b>     |                      |                   |                    |                                     |                                |
| Leucocyte (G/L)  | 12.83                | 13.92             | 13.51              | 15.19                               | 14.97                          |
| Neutrophil (G/L) | 1.15                 | 1.37              | 1.15               | 1.75**                              | 1.61*                          |
| Fibrinogen (g/L) | 3.24                 | 5.60**            | 3.44               | 4.15                                | 5.78**                         |
| <b>Day 45</b>    |                      |                   |                    |                                     |                                |
| Leucocyte (G/L)  | 12.32                | 14.17             | 11.80              | 16.48**                             | 14.26                          |
| Neutrophil (G/L) | 1.22                 | 1.76*             | 1.32               | 4.93**                              | 2.33**                         |
| Fibrinogen (g/L) | 3.36                 | 4.72**            | 3.42               | 4.71**                              | 5.67**                         |
| <b>Day 65</b>    |                      |                   |                    |                                     |                                |
| Leucocyte (G/L)  | 15.29                | 17.91             | 15.04              | 9.67                                | 14.90                          |
| Neutrophil (G/L) | 1.36                 | 2.25              | 1.39               | 1.15                                | 1.46                           |
| Fibrinogen (g/L) | 2.99                 | 3.05              | 3.12               | 3.11                                | 3.03                           |

Statistically significant from controls: \*: (p<0.05) or \*\*: (p<0.01)

## SUPPLEMENTARY TABLE 5

### Haematology parameters in female rats

| TIME/PARAMETER             | TREATMENT            |                   |                    |                                     |                                |
|----------------------------|----------------------|-------------------|--------------------|-------------------------------------|--------------------------------|
|                            | Group 1<br>0.9% NaCl | Group 2<br>GLA-SE | Group 3<br>PRIMVAC | Group 4<br>PRIMVAC +<br>Alhydrogel® | Group 5<br>PRIMVAC +<br>GLA-SE |
| <b>Day 3</b>               |                      |                   |                    |                                     |                                |
| Leucocyte (G/L)            | 6.76                 | 10.42**           | 7.86               | 10.01**                             | 10.13**                        |
| Neutrophil (G/L)           | 0.70                 | 1.10**            | 0.66               | 1.36**                              | 1.46**                         |
| Eosinophil (G/L)           | 0.11                 | 0.20**            | 0.12               | 0.13                                | 0.19**                         |
| Basophil (G/L)             | 0.02                 | 0.05**            | 0.02               | 0.03                                | 0.04**                         |
| Lymphocyte (G/L)           | 5.77                 | 8.65**            | 6.88               | 8.12*                               | 7.92                           |
| Large unstained cell (G/L) | 0.03                 | 0.13**            | 0.05               | 0.09**                              | 0.18**                         |
| Monocyte (G/L)             | 0.12                 | 0.30**            | 0.13               | 0.29**                              | 0.34**                         |
| Fibrinogen (g/L)           | 2.79                 | 5.10**            | 3.03               | 3.40**                              | 5.44**                         |
| <b>Day 45</b>              |                      |                   |                    |                                     |                                |
| Leucocyte (G/L)            | 7.40                 | 10.88**           | 9.42               | 11.76**                             | 14.08**                        |
| Neutrophil (G/L)           | 0.60                 | 1.73**            | 0.84               | 3.65**                              | 3.44**                         |
| Eosinophil (G/L)           | 0.16                 | 0.28**            | 0.19               | 0.22                                | 0.43**                         |
| Basophil (G/L)             | 0.02                 | 0.05*             | 0.03               | 0.03                                | 0.07**                         |
| Lymphocyte (G/L)           | 6.30                 | 8.19*             | 7.94*              | 7.14                                | 9.12**                         |
| Large unstained cell (G/L) | 0.06                 | 0.17**            | 0.11*              | 0.14**                              | 0.36**                         |
| Monocyte (G/L)             | 0.25                 | 0.47**            | 0.30               | 0.57**                              | 0.66**                         |
| Fibrinogen (g/L)           | 2.54                 | 4.37**            | 3.12**             | 3.45**                              | 5.85**                         |
| <b>Day 65</b>              |                      |                   |                    |                                     |                                |
| Leucocyte (G/L)            | 8.86                 | 7.83              | 9.72               | 4.77                                | 7.84                           |
| Neutrophil (G/L)           | 0.67                 | 0.84              | 0.68               | 0.49                                | 0.77                           |
| Eosinophil (G/L)           | 0.20                 | 0.14              | 0.19               | 0.10                                | 0.19                           |
| Basophil (G/L)             | 0.03                 | 0.03              | 0.04               | 0.01                                | 0.03                           |
| Lymphocyte (G/L)           | 7.56                 | 6.47              | 8.45               | 4.06                                | 6.53                           |
| Large unstained cell (G/L) | 0.11                 | 0.06              | 0.11               | 0.02                                | 0.06                           |
| Monocyte (G/L)             | 0.29                 | 0.29              | 0.26               | 0.10                                | 0.27                           |
| Fibrinogen (g/L)           | 2.05                 | 2.08              | 2.19               | 1.68                                | 2.16                           |

Statistically significant from controls: \*: (p<0.05) or \*\*: (p<0.01)

## SUPPLEMENTARY TABLE 6

### Plasma alpha-2 macroglobulin levels

| TIMING   | SEX | Group 1<br>0.9% NaCl | Group 2<br>GLA-SE | Group 3<br>PRIMVAC | Group 4<br>PRIMVAC +<br>Alhydrogel® | Group 5<br>PRIMVAC +<br>GLA-SE |
|----------|-----|----------------------|-------------------|--------------------|-------------------------------------|--------------------------------|
| Pre-dose | M   | 101.7                | 84.0              | 93.7               | 96.1                                | 77.6                           |
|          | F   | 55.1                 | 38.0              | 55.9               | 49.6                                | 50.0                           |
| Day 3    | M   | 52.4                 | 2055.5**<br>(x25) | 43.1               | 80.5                                | 3281.3**<br>(X42)              |
|          | F   | 36.0                 | 1511**<br>(x40)   | 38.0               | 43.0                                | 2161**<br>(x43)                |
| Day 45   | M   | 23.3                 | 464.5**<br>(x6)   | 19.0               | 31.8                                | 924.2**<br>(x12)               |
|          | F   | 41.4                 | 349.5*<br>(x9)    | 30.5               | 31.0                                | 1064.1**<br>(x21)              |
| Day 65   | M   | 6.8                  | 20.9*             | 3.5                | 17.2                                | 19.0                           |
|          | F   | 20.5                 | 24.7              | 26.8               | 24.5                                | 47.7**                         |

Statistically significant from controls: \*: (p<0.05) or \*\*: (p<0.01)





## SUPPLEMENTARY FIGURE 3

**Immune recognition of erythrocytes infected by different parasite strains (NF54, FCR3, and 7G8) selected for different adhesive phenotypes (CSA and CD36) by vaccination-induced antibodies directed towards native VAR2CSA**

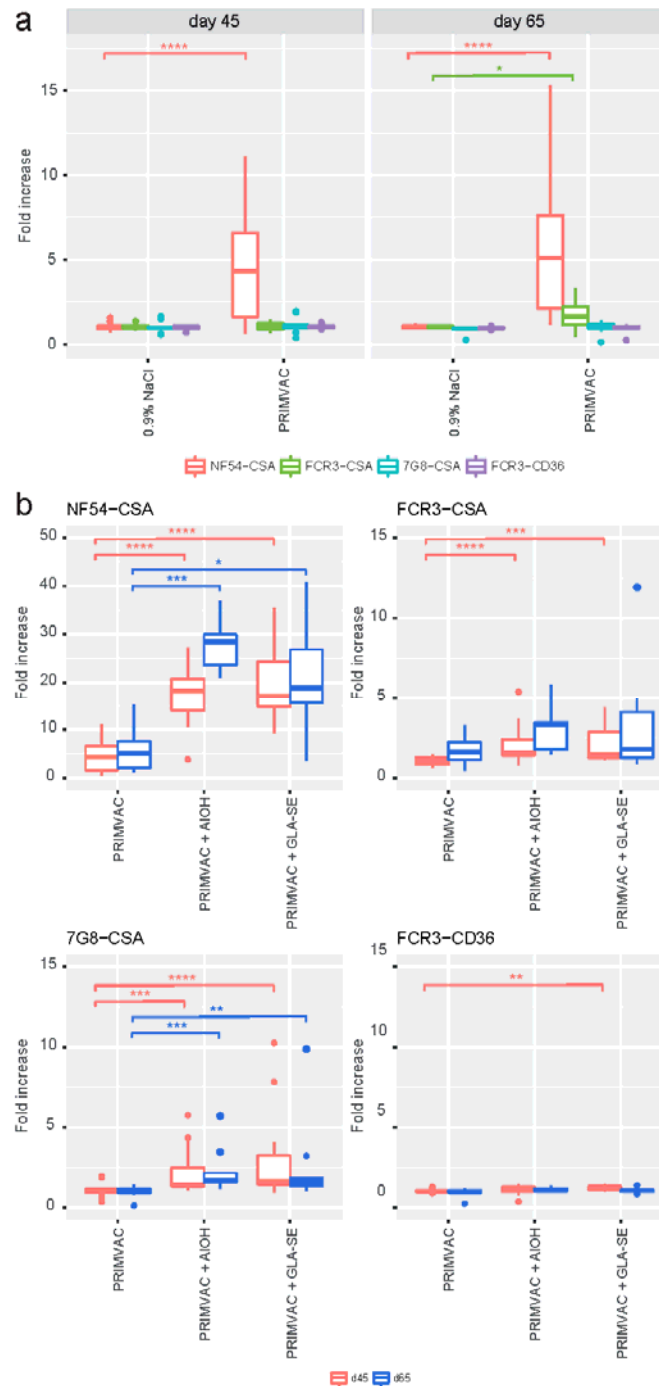

**(A)** Wilcoxon rank sum test was performed for each of the 8 parasite strain/time of sacrifice combinations separately. \*,  $p \leq 0.05$ ; \*\*,  $p \leq 0.01$ ; \*\*\*\*,  $p \leq 0.0001$  (45-day groups: 0.9% NaCl,  $n=19$ ; PRIMVAC,  $n=20$ . 65-day groups,  $n=10$ ).

**(B)** Kruskal-Wallis one-way ANOVA on ranks test was performed for each of the 8 parasite strain/time of sacrifice combinations separately, followed by Dunn's multiple comparison procedure in case of showing differences at a 0.05 significance level. Significant differences against the PRIMVAC group are shown: \*,  $p \leq 0.05$ ; \*\*,  $p \leq 0.01$ ; \*\*\*,  $p \leq 0.001$ ; \*\*\*\*,  $p \leq 0.0001$  (45-day groups: PRIMVAC,  $n=20$ ; PRIMVAC + AIOH (Alhydrogel<sup>®</sup>),  $n=18$ ; PRIMVAC + GLA-SE,  $n=19$ . 65-day groups,  $n=10$ ).

## SUPPLEMENTARY TABLE 7

### Sera pools used in inhibitions assays

| GROUPS | TREATMENTS                        | SERA POOLS |            |
|--------|-----------------------------------|------------|------------|
| 1      | 0.9% NaCl                         | pool 1M    | 16 males   |
|        |                                   | pool 1F    | 15 females |
| 3      | PRIMVAC                           | pool 3M    | 15 males   |
|        |                                   | pool 3F    | 15 females |
| 4      | PRIMVAC + Alhydrogel <sup>®</sup> | pool 4M    | 17males    |
|        |                                   | pool 4F    | 15 females |
| 5      | PRIMVAC + GLA-SE                  | pool 5M    | 15 males   |
|        |                                   | pool 5F    | 15 females |
